# Supplementary material for: Chromane Derivatives from Underground Parts of Iris tenuifolia and Their In Vitro Antimicrobial, Cytotoxicity and Antiproliferative Evaluation
Source: MDPI journal article supplement (doi:10.3390/molecules26216705), 2021-11-05
Supplement: s1 [file s1]

# Chromane Derivatives from Underground Parts of *Iris tenuifolia* and Their In Vitro Antimicrobial, Cytotoxicity and Antiproliferative Evaluation

Oldokh Otgon <sup>1</sup>, Suvd Nadmid <sup>2</sup>, Christian Paetz <sup>3</sup>, Hans-Martin Dahse <sup>4</sup>, Kerstin Voigt <sup>4</sup>, Stefan Bartram <sup>3</sup>, Wilhelm Boland <sup>3</sup> and Enkhmaa Dagvadorj <sup>1,\*</sup>

<sup>1</sup> Department of Chemistry, School of Biomedicine, Mongolian National University of Medical Sciences, S.Zorig street 3, Ulaanbaatar 14210, Mongolia; oldokh.o@mnums.edu.mn (O.O.)

<sup>2</sup> Department of Pharmaceutical Chemistry, School of Pharmacy, Mongolian National University of Medical Sciences, S.Zorig street 3, Ulaanbaatar 14210, Mongolia; suvd.n@mnums.edu.mn (S.N.)

<sup>3</sup> Max Planck Institute for Chemical Ecology, Hans-Knoell-Strasse 8, D-07745 Jena, Germany; cpaetz@ice.mpg.de (C.P.); bartram@ice.mpg.de (S.B.); boland@ice.mpg.de (W.B.)

<sup>4</sup> Leibniz Institute for Natural Product Research and Infection Biology, Hans Knöll Institute (HKI), Adolf-Reichwein-Strasse 23, D-07745 Jena, Germany; hans-martin.dahse@leibniz-hki.de (H.-M.D.); kerstin.voigt@hki-jena.de (K.V.)

\* Correspondence: enkhmaa.d@mnums.edu.mn (E.D.); Tel.: +976-99084787

| Contents Lists                                                                                                     | Page |
|--------------------------------------------------------------------------------------------------------------------|------|
| <b>Figure S1</b> <sup>1</sup> H NMR spectrum of compound <b>1</b> (500 MHz, DMSO- <i>d</i> <sub>6</sub> )          | 2    |
| <b>Figure S2</b> <sup>13</sup> C NMR spectrum of compound <b>1</b> (125 MHz, DMSO- <i>d</i> <sub>6</sub> )         | 2    |
| <b>Figure S3</b> <sup>1</sup> H- <sup>1</sup> H COSY spectrum of compound <b>1</b> (DMSO- <i>d</i> <sub>6</sub> )  | 3    |
| <b>Figure S4</b> HSQC spectrum of compound <b>1</b> (DMSO- <i>d</i> <sub>6</sub> )                                 | 3    |
| <b>Figure S5</b> HMBC spectrum of compound <b>1</b> (DMSO- <i>d</i> <sub>6</sub> )                                 | 4    |
| <b>Figure S6</b> ROESY spectrum of compound <b>1</b> (DMSO- <i>d</i> <sub>6</sub> )                                | 4    |
| <b>Figure S7</b> HR-ESI-MS spectrum of compound <b>1</b>                                                           | 4    |
| <b>Figure S8</b> UV spectrum of compound <b>1</b>                                                                  | 5    |
| <b>Figure S9</b> CD spectrum of compound <b>1</b>                                                                  | 5    |
| <b>Figure S10</b> HR-MS/MS fragmentation of compound <b>1</b>                                                      | 5    |
| <b>Figure S11</b> <sup>1</sup> H NMR spectrum of compound <b>2</b> (500 MHz, CDCl <sub>3</sub> )                   | 6    |
| <b>Figure S12</b> <sup>13</sup> C NMR spectrum of compound <b>2</b> (125 MHz, CDCl <sub>3</sub> )                  | 6    |
| <b>Figure S13</b> <sup>1</sup> H- <sup>1</sup> H COSY spectrum of compound <b>2</b> (CDCl <sub>3</sub> )           | 7    |
| <b>Figure S14</b> HSQC spectrum of compound <b>2</b> (CDCl <sub>3</sub> )                                          | 7    |
| <b>Figure S15</b> HMBC spectrum of compound <b>2</b> (CDCl <sub>3</sub> )                                          | 7    |
| <b>Figure S16</b> HR-ESI-MS spectrum of compound <b>2</b>                                                          | 8    |
| <b>Figure S17</b> UV spectrum of compound <b>2</b>                                                                 | 8    |
| <b>Figure S18</b> <sup>1</sup> H NMR spectrum of compound <b>3</b> (500 MHz, DMSO- <i>d</i> <sub>6</sub> )         | 9    |
| <b>Figure S19</b> <sup>13</sup> C NMR spectrum of compound <b>3</b> (125 MHz, DMSO- <i>d</i> <sub>6</sub> )        | 9    |
| <b>Figure S20</b> <sup>1</sup> H- <sup>1</sup> H COSY spectrum of compound <b>3</b> (DMSO- <i>d</i> <sub>6</sub> ) | 10   |
| <b>Figure S21</b> HSQC spectrum of compound <b>3</b> (DMSO- <i>d</i> <sub>6</sub> )                                | 10   |
| <b>Figure S22</b> HMBC spectrum of compound <b>3</b> (DMSO- <i>d</i> <sub>6</sub> )                                | 10   |
| <b>Figure S23</b> HR-ESI-MS spectrum of compound <b>3</b>                                                          | 11   |
| <b>Figure S24</b> UV spectrum of compound <b>3</b>                                                                 | 11   |
| <b>Figure S25</b> CD spectrum of compound <b>3</b>                                                                 | 11   |
| <b>Figure S26</b> <sup>1</sup> H NMR spectrum of compound <b>9</b> (500 MHz, DMSO- <i>d</i> <sub>6</sub> )         | 12   |
| <b>Figure S27</b> <sup>13</sup> C NMR spectrum of compound <b>9</b> (125 MHz, DMSO- <i>d</i> <sub>6</sub> )        | 12   |

|                                                                                                        |    |
|--------------------------------------------------------------------------------------------------------|----|
| <b>Figure S28</b> $^1\text{H}$ - $^1\text{H}$ COSY spectrum of compound <b>9</b> ( $\text{DMSO-}d_6$ ) | 13 |
| <b>Figure S29</b> HSQC spectrum of compound <b>9</b> ( $\text{DMSO-}d_6$ )                             | 13 |
| <b>Figure S30</b> HMBC spectrum of compound <b>9</b> ( $\text{DMSO-}d_6$ )                             | 13 |
| <b>Figure S31</b> HR-ESI-MS spectrum of compound <b>9</b>                                              | 14 |
| <b>Figure S32</b> UV spectrum of compound <b>9</b>                                                     | 14 |
| <b>Figure S33</b> $^1\text{H}$ NMR spectrum of compound <b>10</b> (500 MHz, $\text{CDCl}_3$ )          | 15 |
| <b>Figure S34</b> $^{13}\text{C}$ NMR spectrum of compound <b>10</b> (125 MHz, $\text{CDCl}_3$ )       | 15 |
| <b>Figure S35</b> $^1\text{H}$ - $^1\text{H}$ COSY spectrum of compound <b>10</b> ( $\text{CDCl}_3$ )  | 16 |
| <b>Figure S36</b> HSQC spectrum of compound <b>10</b> ( $\text{CDCl}_3$ )                              | 16 |
| <b>Figure S37</b> HMBC spectrum of compound <b>10</b> ( $\text{CDCl}_3$ )                              | 16 |
| <b>Figure S38</b> HR-ESI-MS spectrum of compound <b>10</b>                                             | 17 |
| <b>Figure S39</b> UV spectrum of compound <b>10</b>                                                    | 17 |

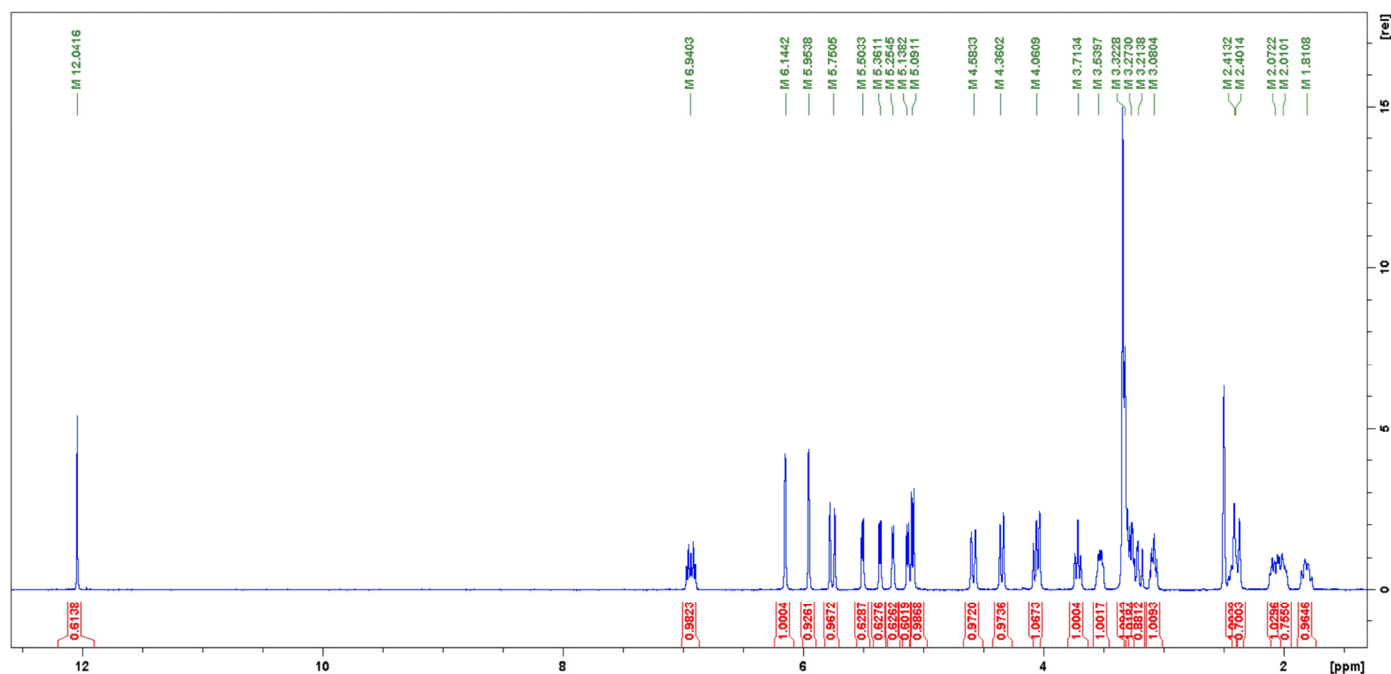

**Figure S1**  $^1\text{H}$  NMR spectrum of compound **1** (500 MHz,  $\text{DMSO-}d_6$ )

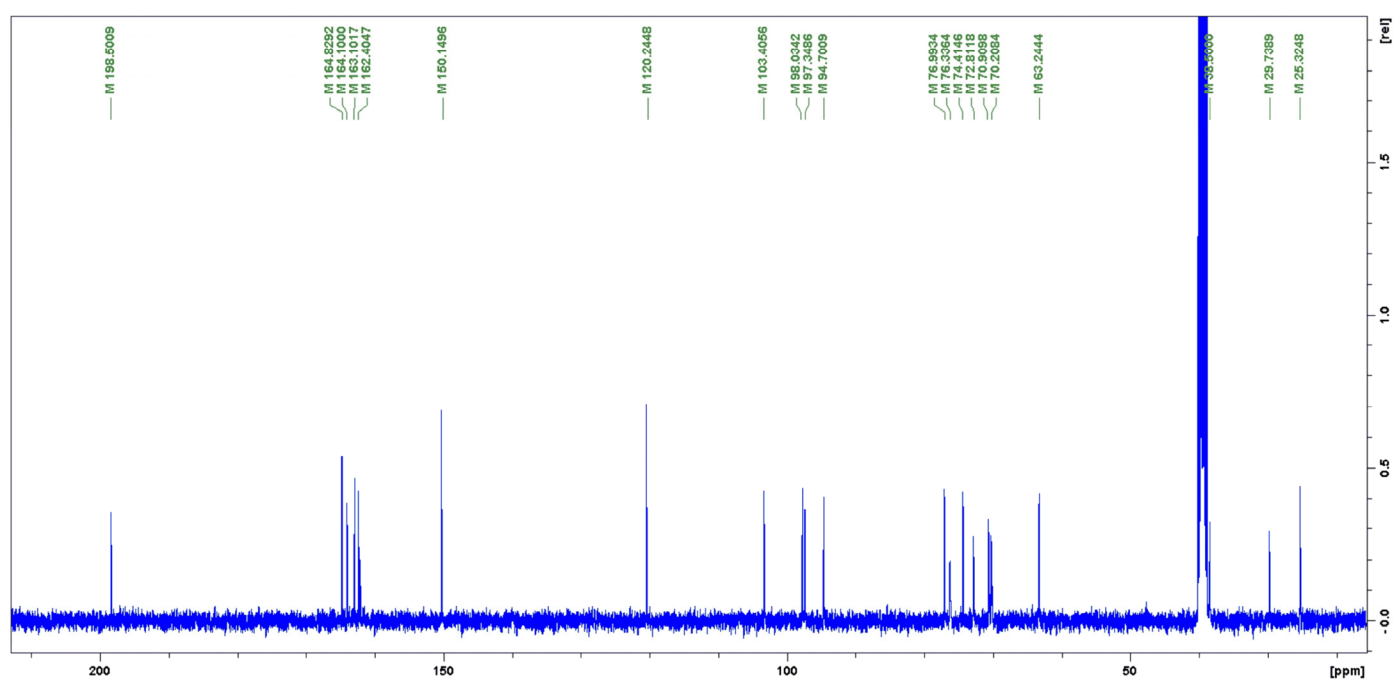

Figure S2  $^{13}\text{C}$  NMR spectrum of compound **1** (125 MHz,  $\text{DMSO-}d_6$ )

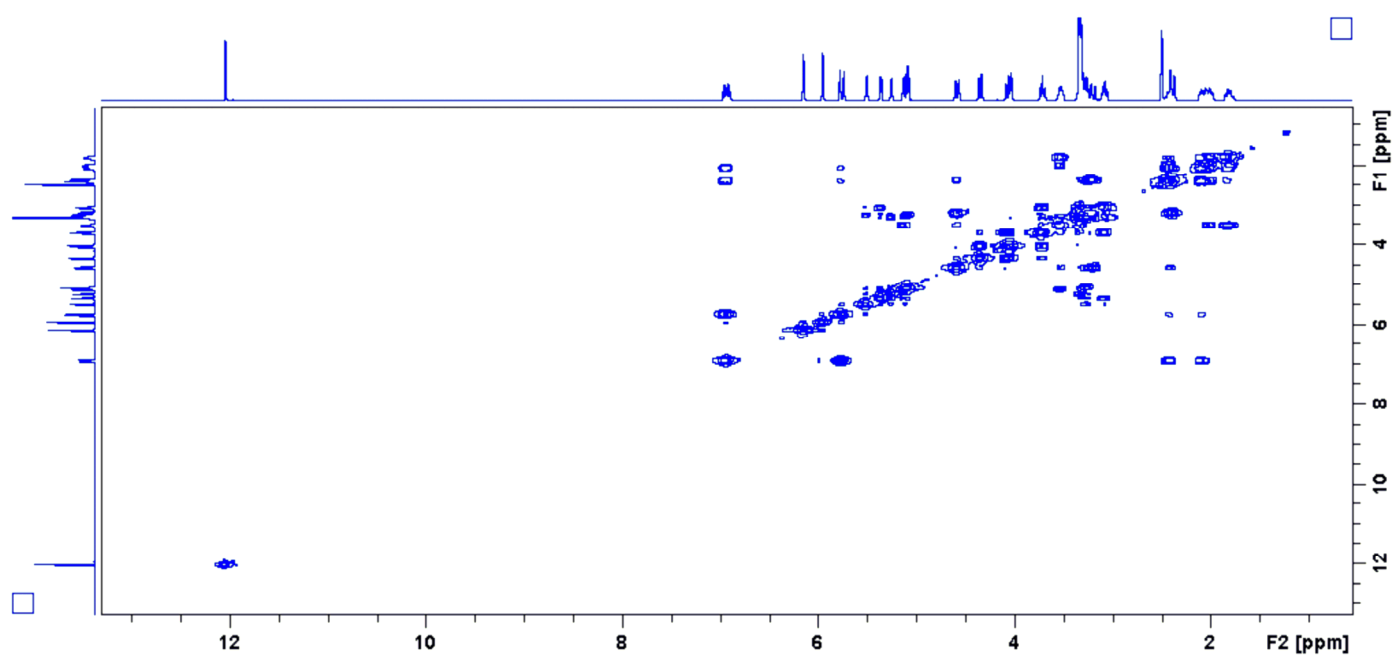

Figure S3  $^1\text{H}$ - $^1\text{H}$  COSY spectrum of compound **1** ( $\text{DMSO-}d_6$ )

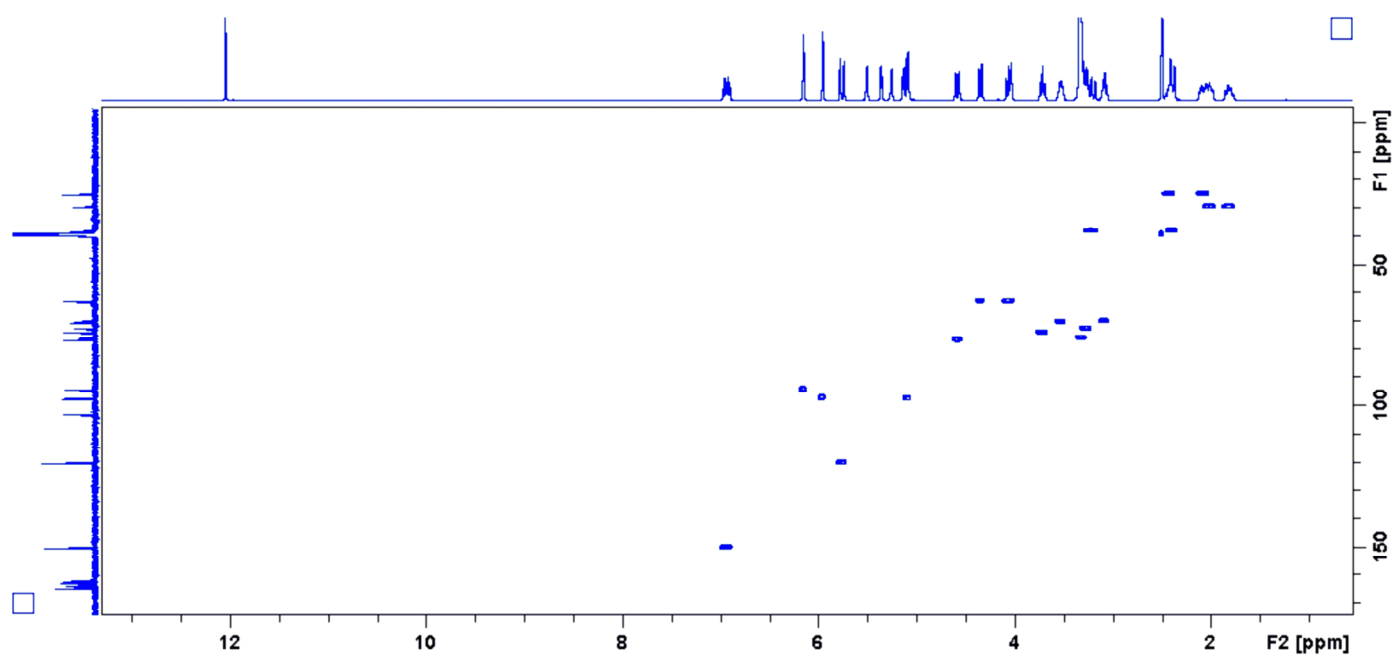

Figure S4 HSQC spectrum of compound 1 (DMSO- $d_6$ )

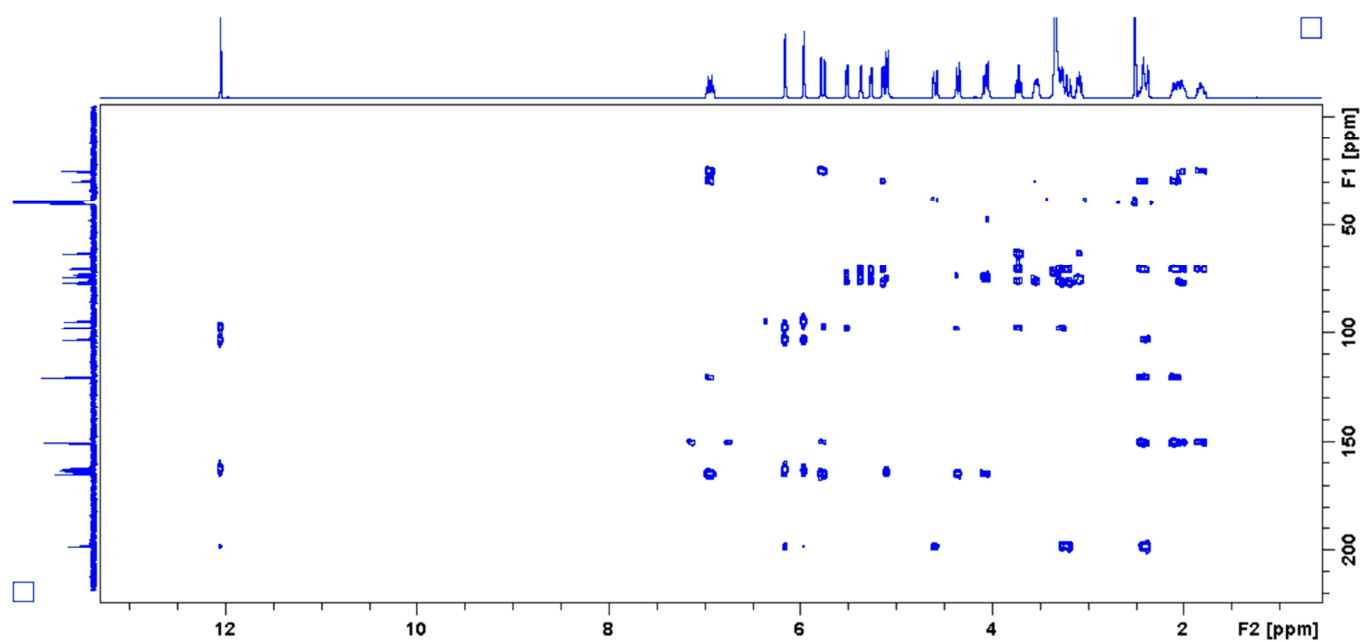

Figure S5 HMBC spectrum of compound 1 (DMSO- $d_6$ )

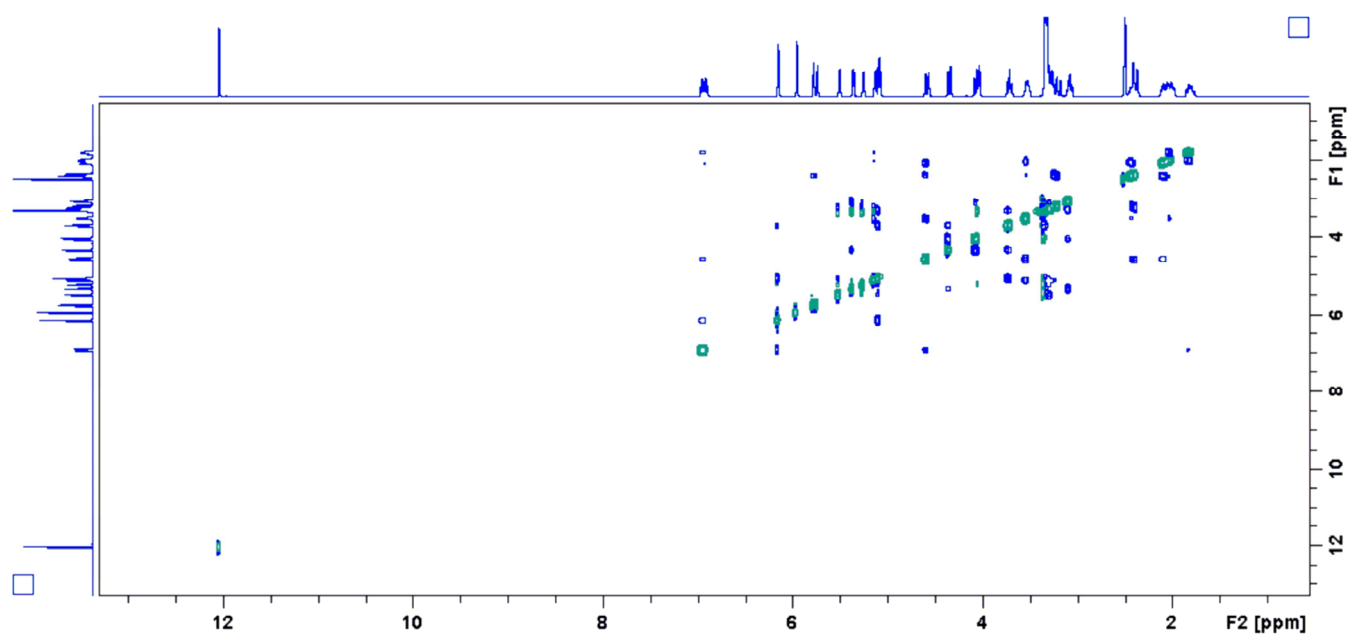

Figure S6 ROESY spectrum of compound **1** (DMSO-*d*<sub>6</sub>)

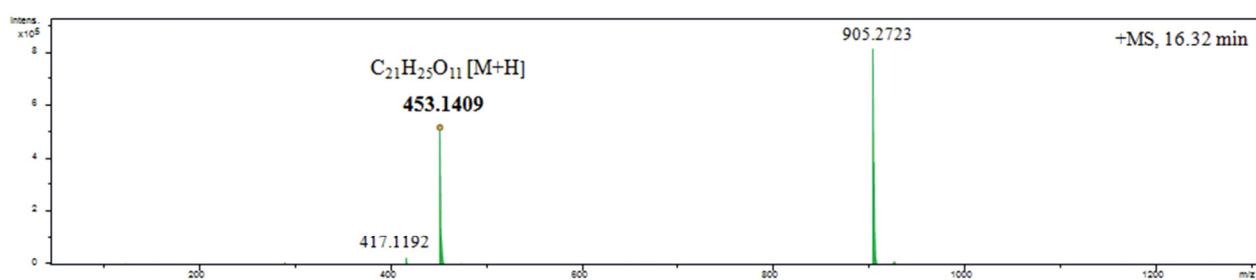

Figure S7 HR-ESI-MS spectrum of compound **1**

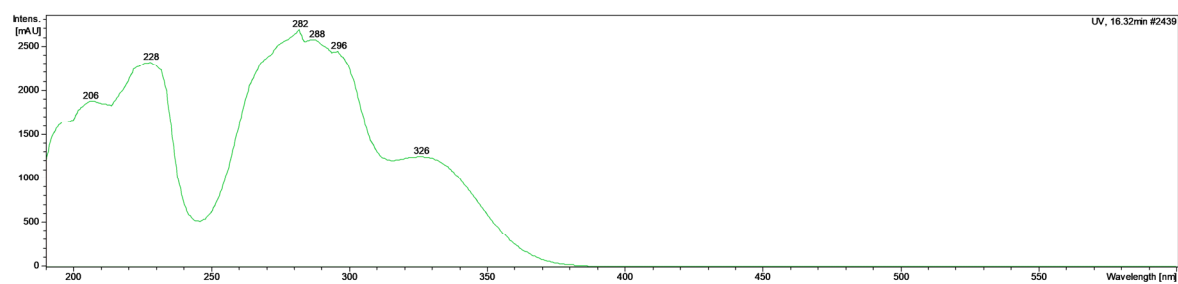

Figure S8 UV spectrum of compound **1**

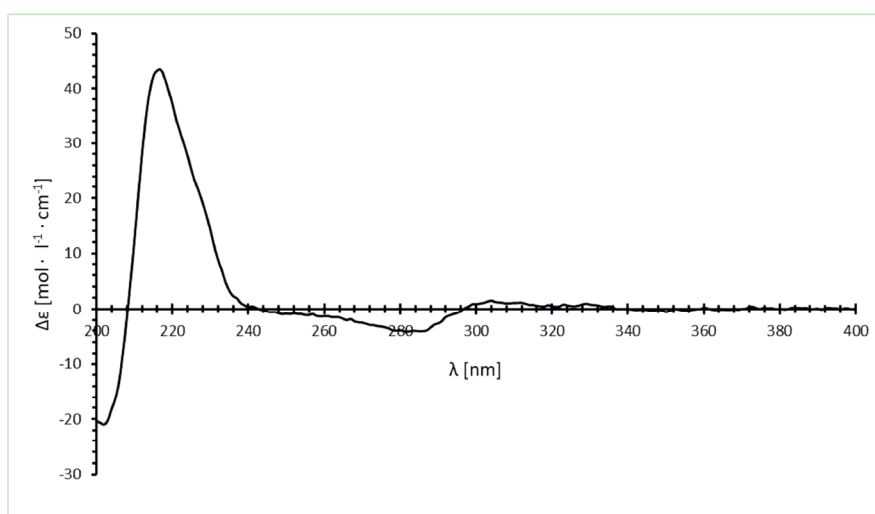

Figure S9 CD spectrum of compound 1

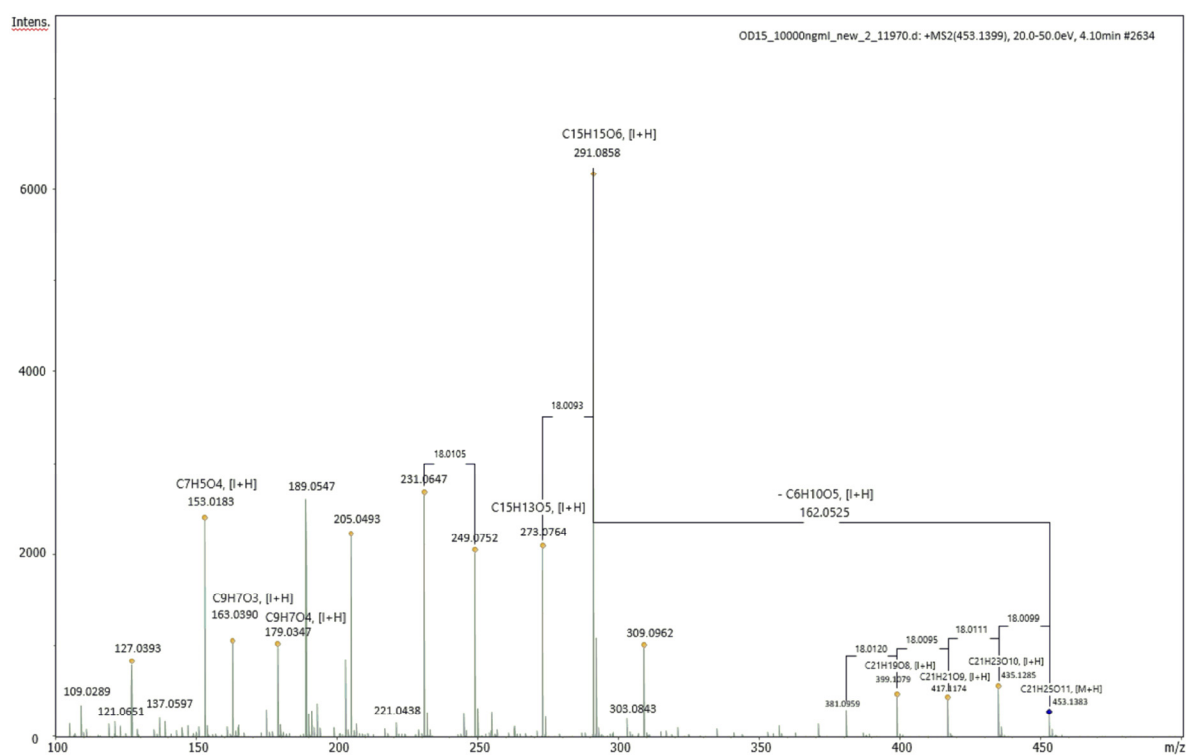

Figure S10 HR-MS/MS fragmentation of compound 1

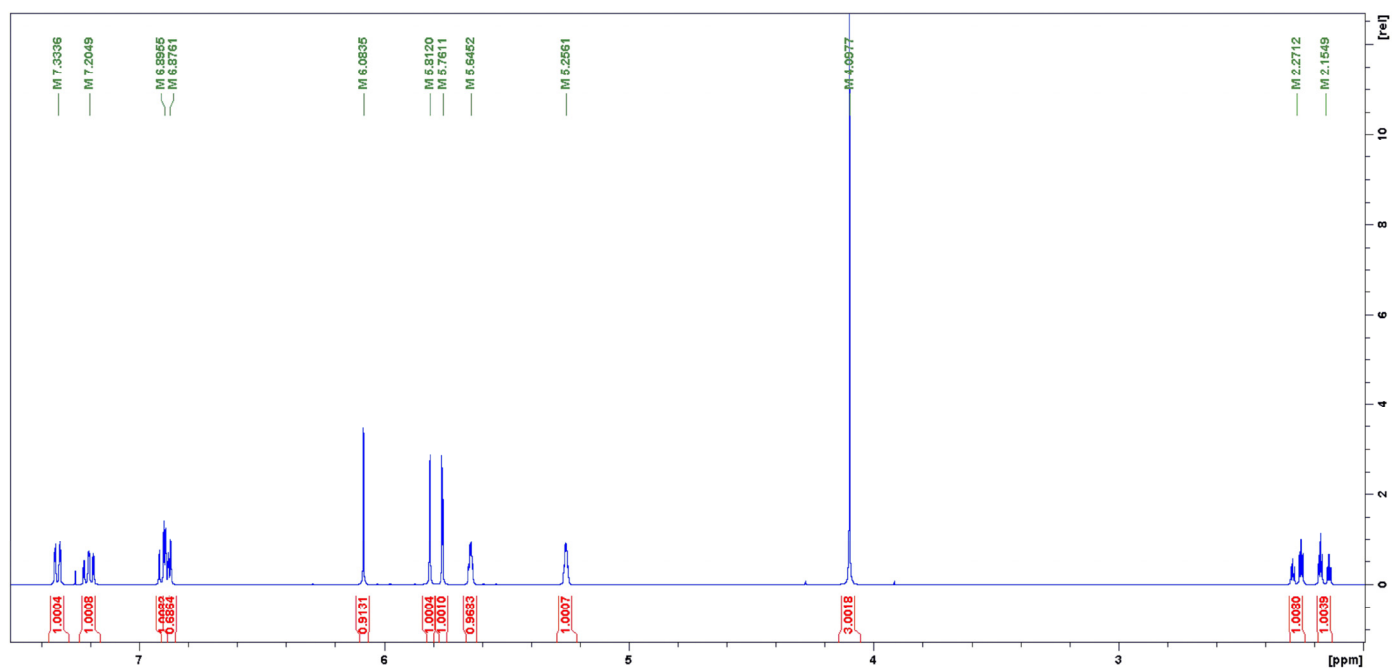

Figure S11 <sup>1</sup>H NMR spectrum of compound 2 (500 MHz, CDCl<sub>3</sub>)

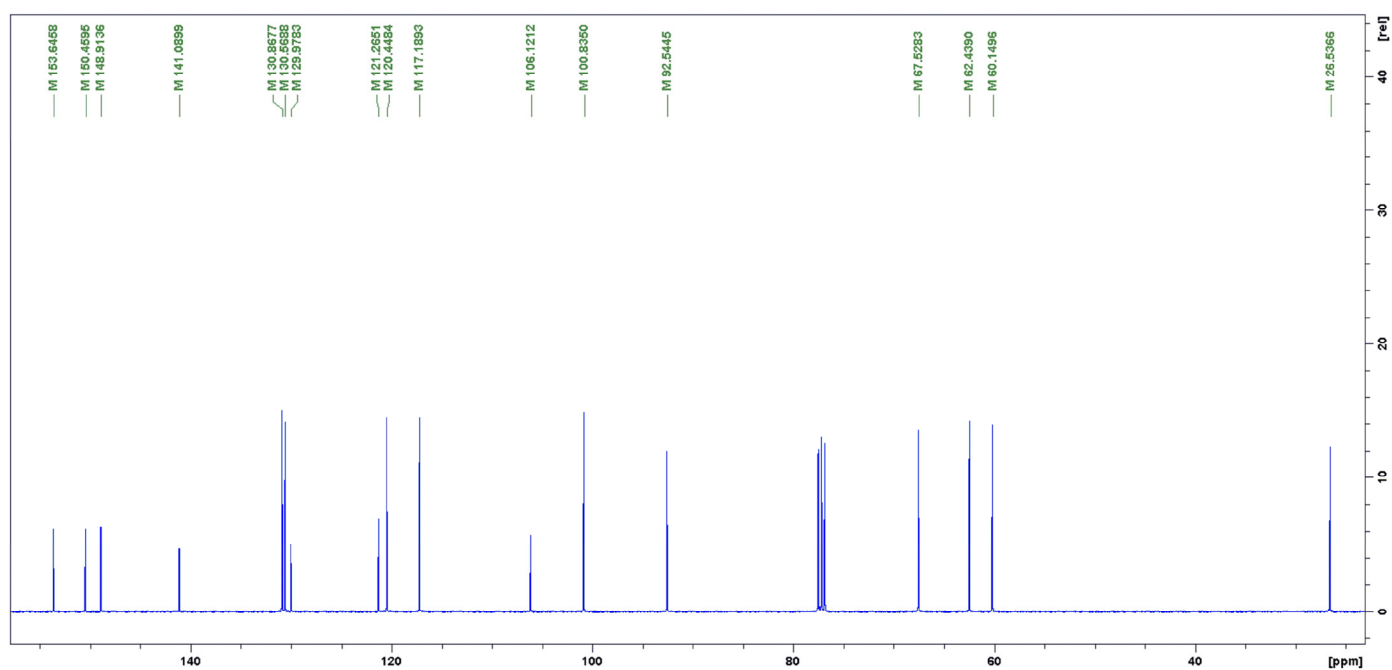

Figure S12 <sup>13</sup>C NMR spectrum of compound 2 (125 MHz, CDCl<sub>3</sub>)

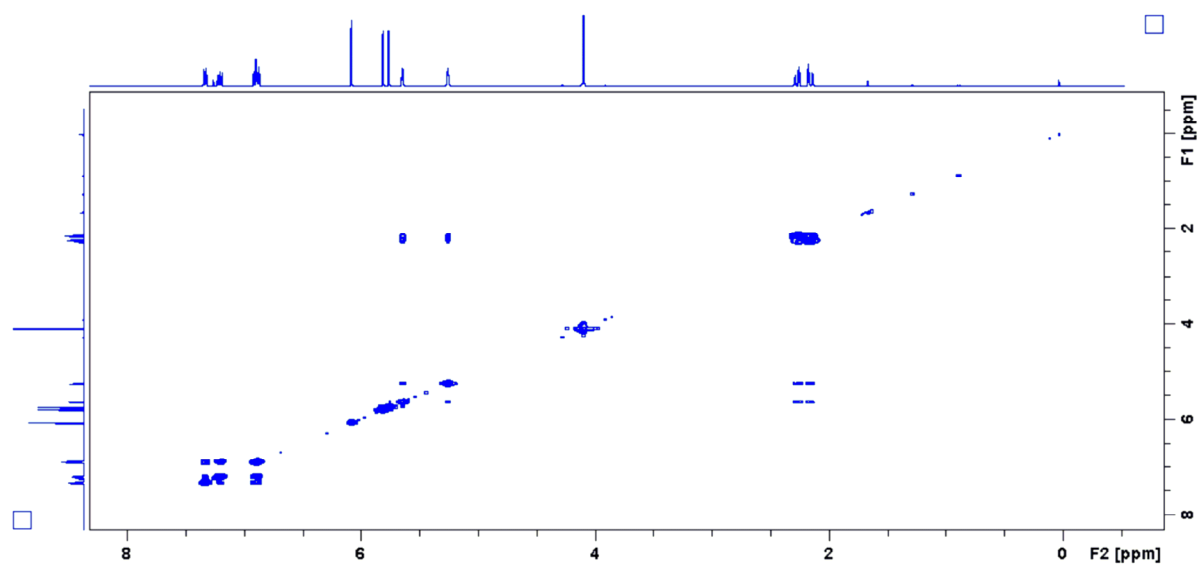

Figure S13  $^1\text{H}$ - $^1\text{H}$  COSY spectrum of compound 2 ( $\text{CDCl}_3$ )

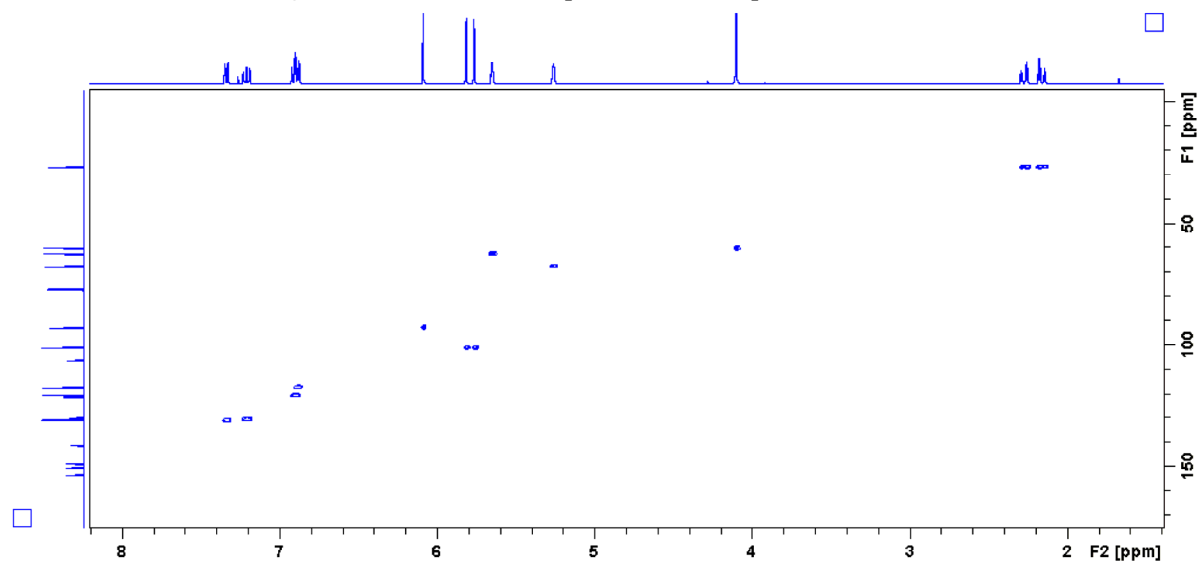

Figure S14 HSQC spectrum of compound 2 ( $\text{CDCl}_3$ )

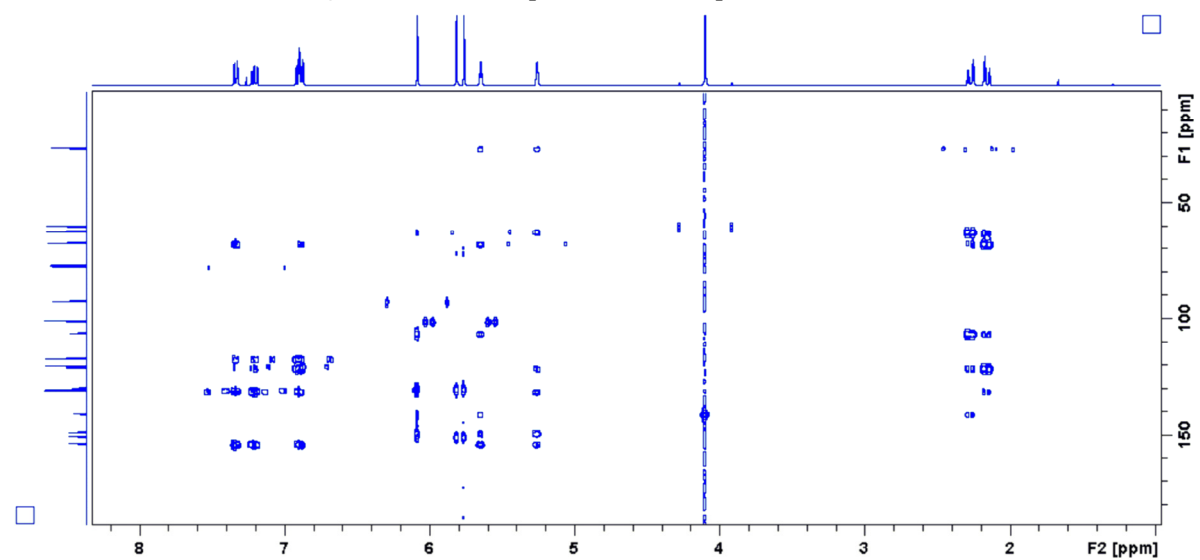

Figure S15 HMBC spectrum of compound 2 ( $\text{CDCl}_3$ )



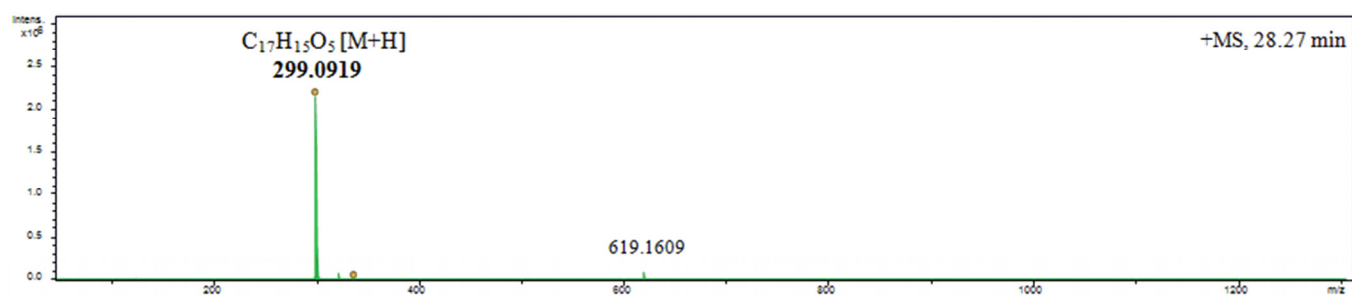

Figure S16 HR-ESI-MS spectrum of compound 2

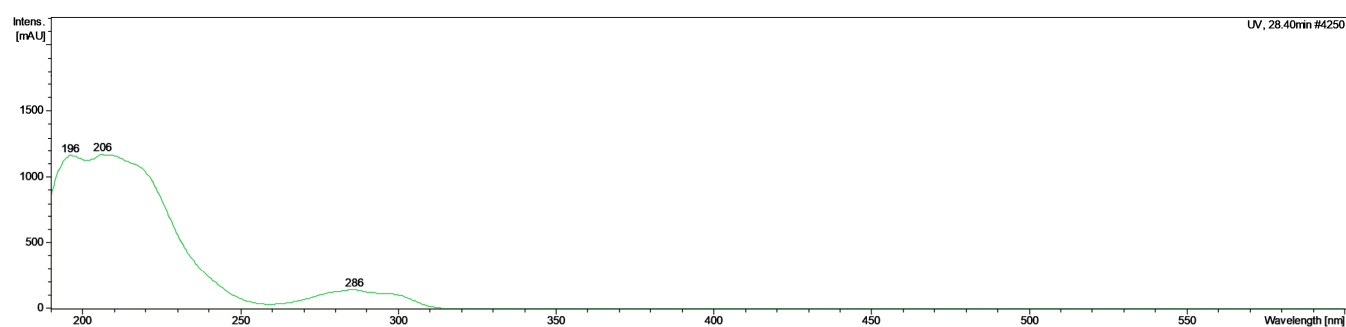

Figure S17 UV spectrum of compound 2

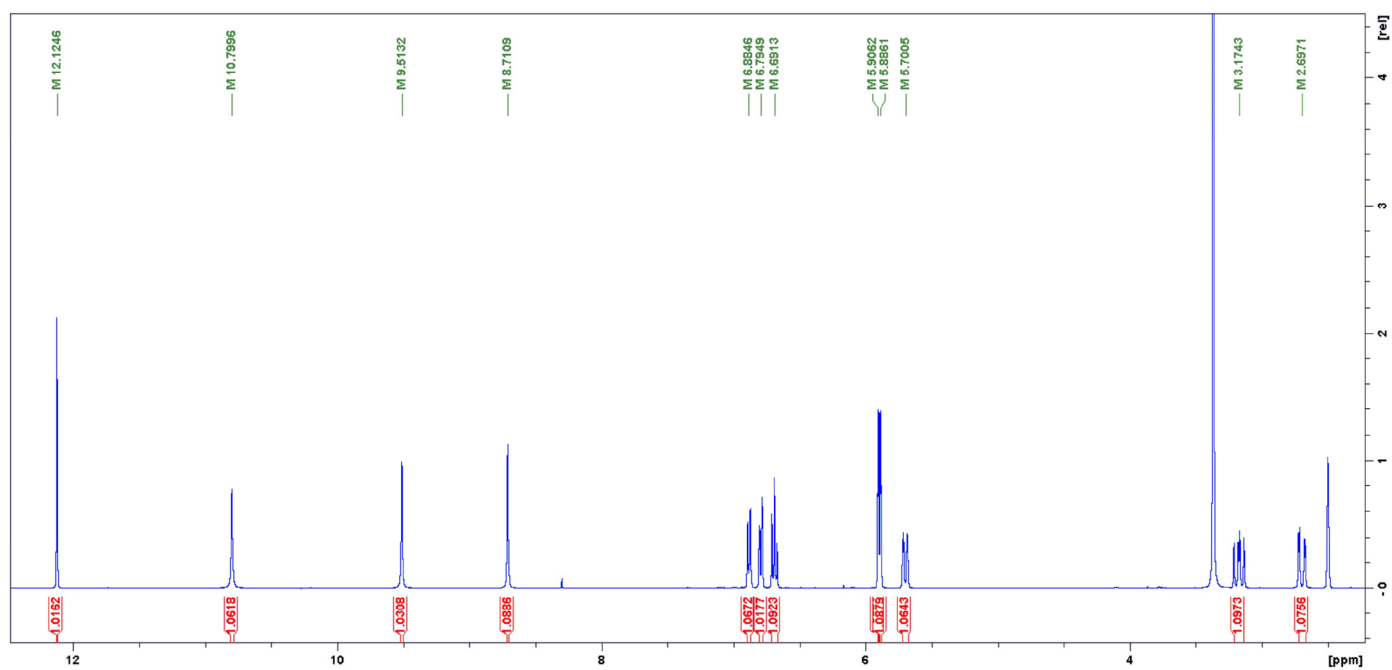

Figure S18 <sup>1</sup>H NMR spectrum of compound 3 (500 MHz, DMSO-*d*<sub>6</sub>)

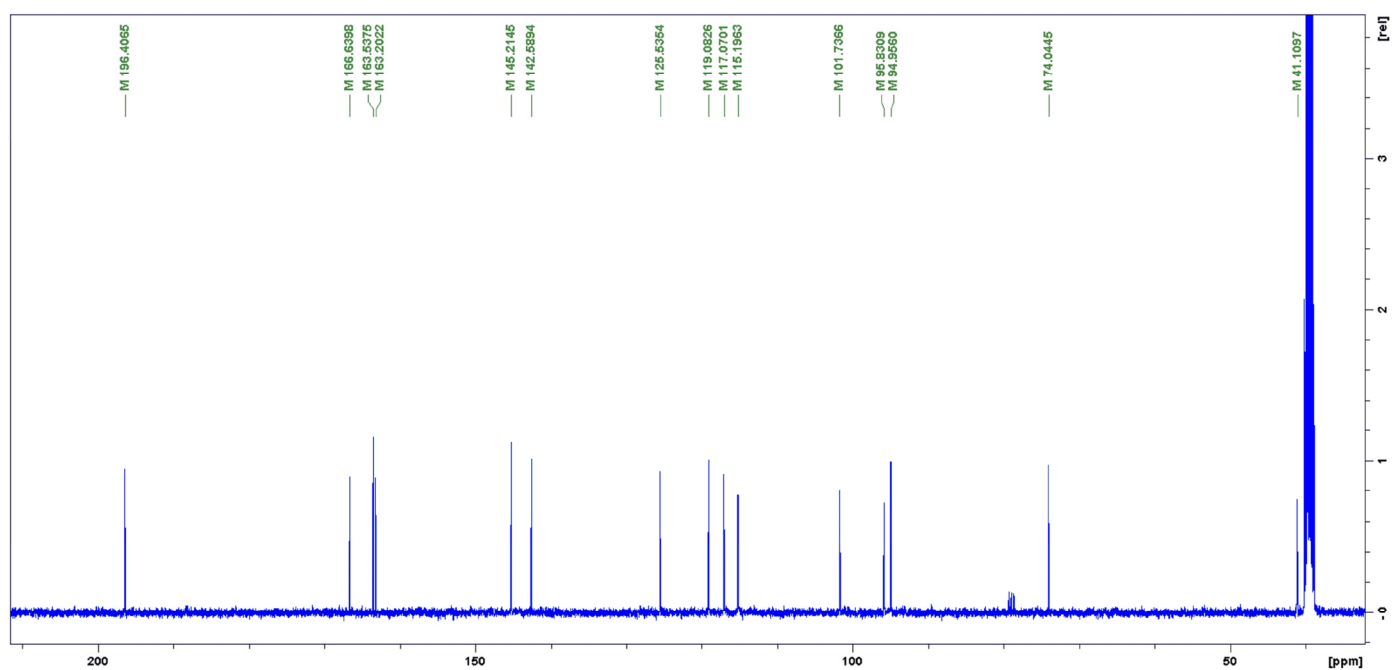

Figure S19 <sup>13</sup>C NMR spectrum of compound 3 (125 MHz, DMSO-*d*<sub>6</sub>)

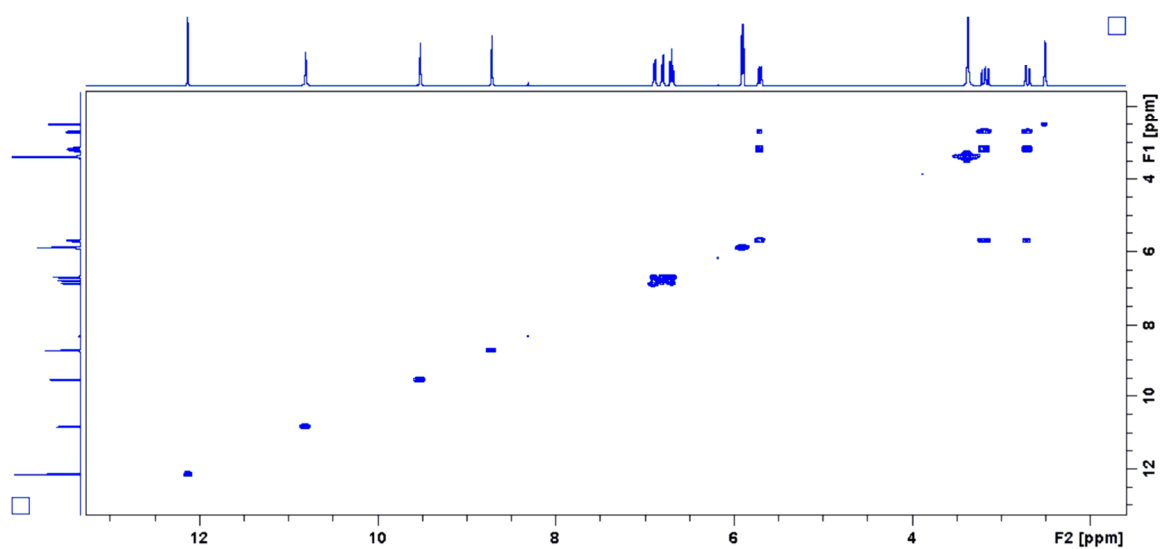

**Figure S20**  $^1\text{H}$ - $^1\text{H}$  COSY spectrum of compound 3 ( $\text{DMSO}-d_6$ )

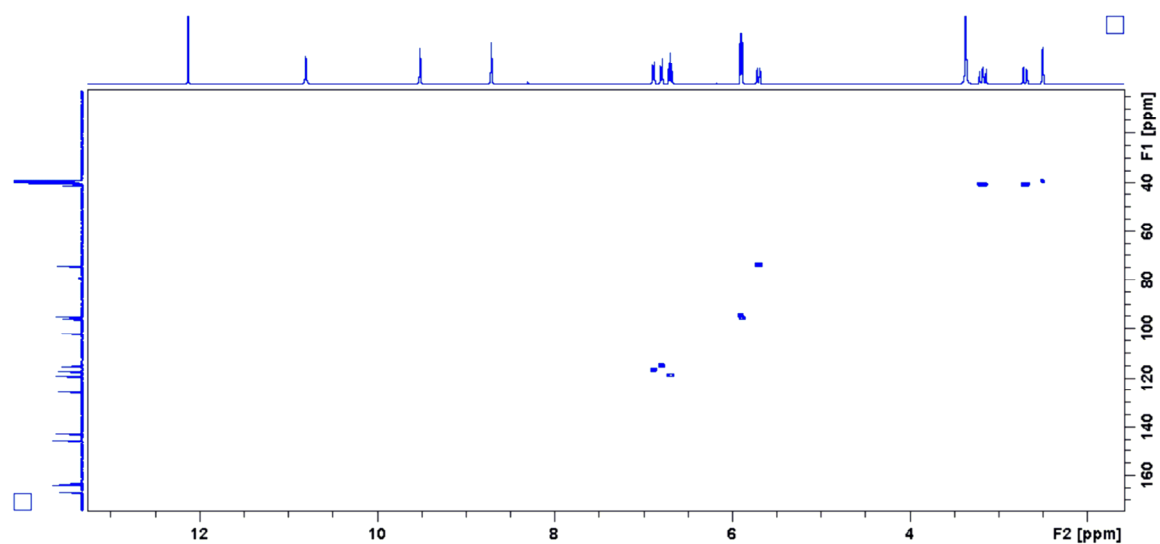

**Figure S21** HSQC spectrum of compound 3 ( $\text{DMSO}-d_6$ )

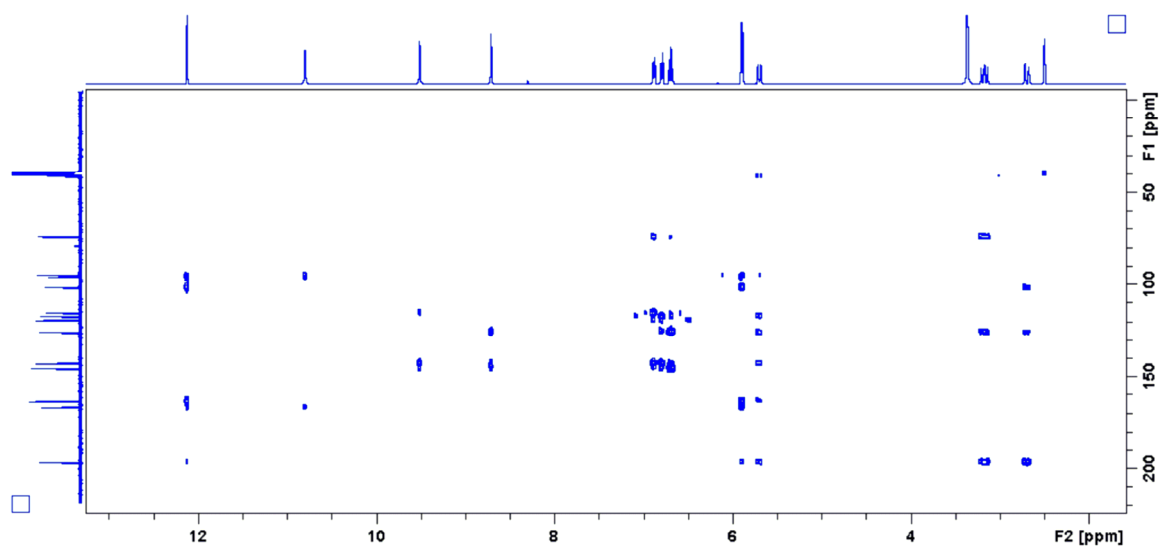

**Figure S22** HMBC spectrum of compound 3 ( $\text{DMSO}-d_6$ )

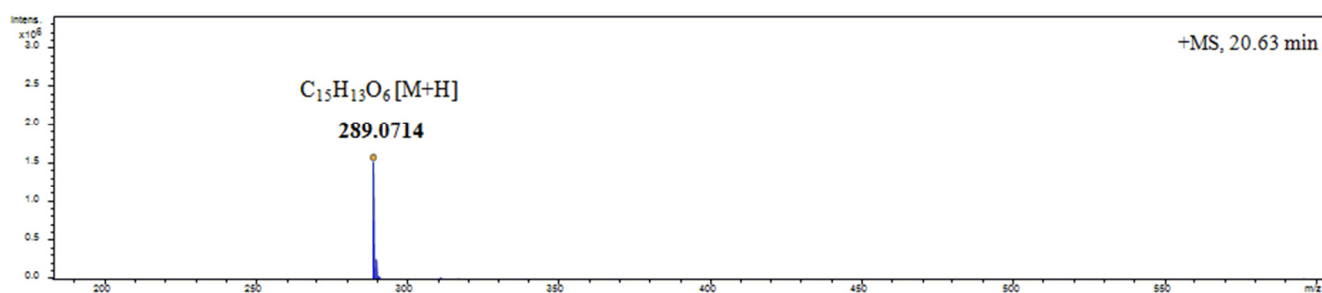

Figure S23 HR-ESI-MS spectrum of compound 3

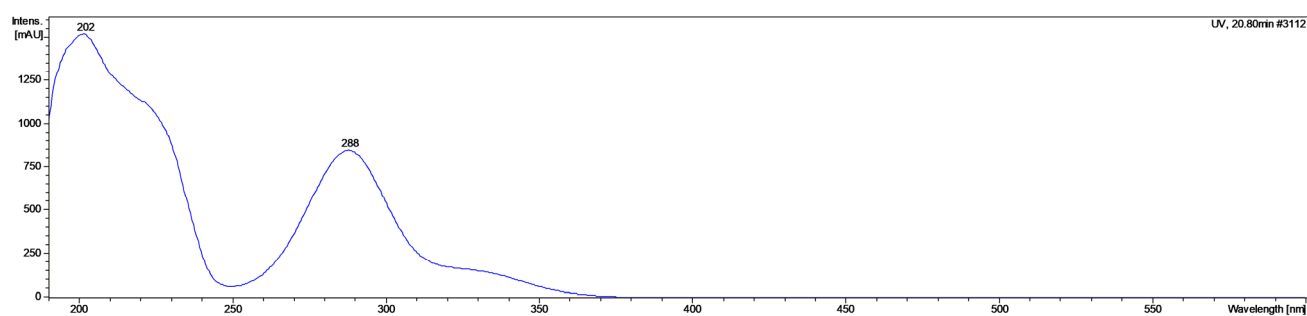

Figure S24 UV spectrum of compound 3

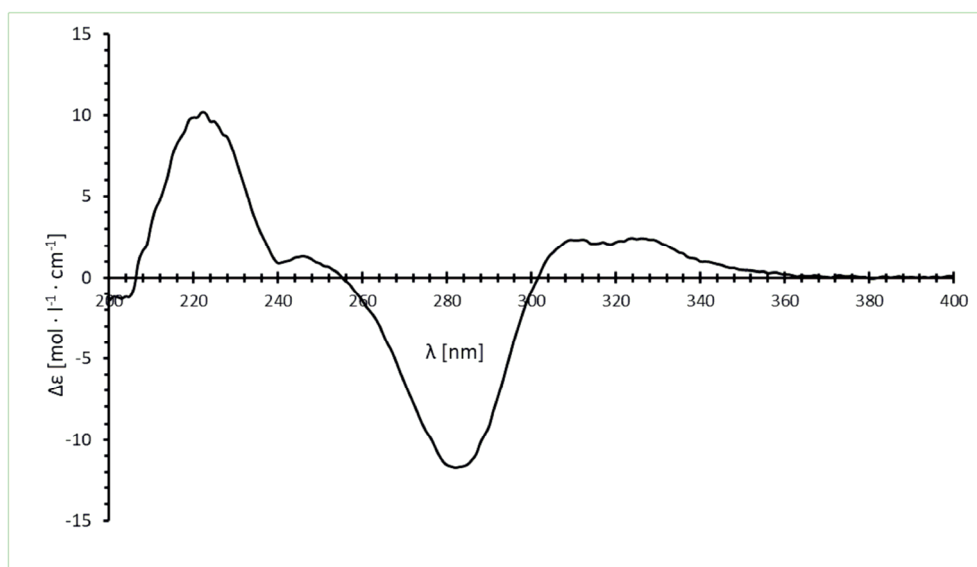

Figure S25 CD spectrum of compound 3

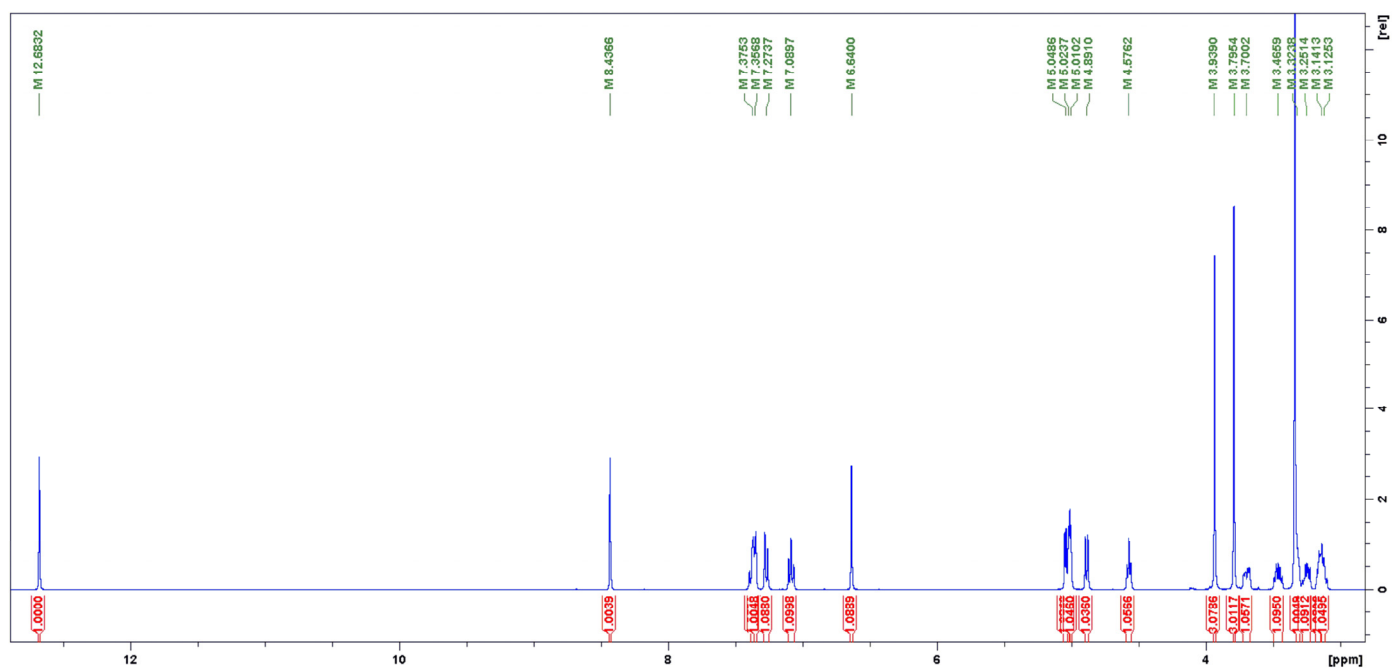

Figure S26 <sup>1</sup>H NMR spectrum of compound **9** (500 MHz, DMSO-*d*<sub>6</sub>)

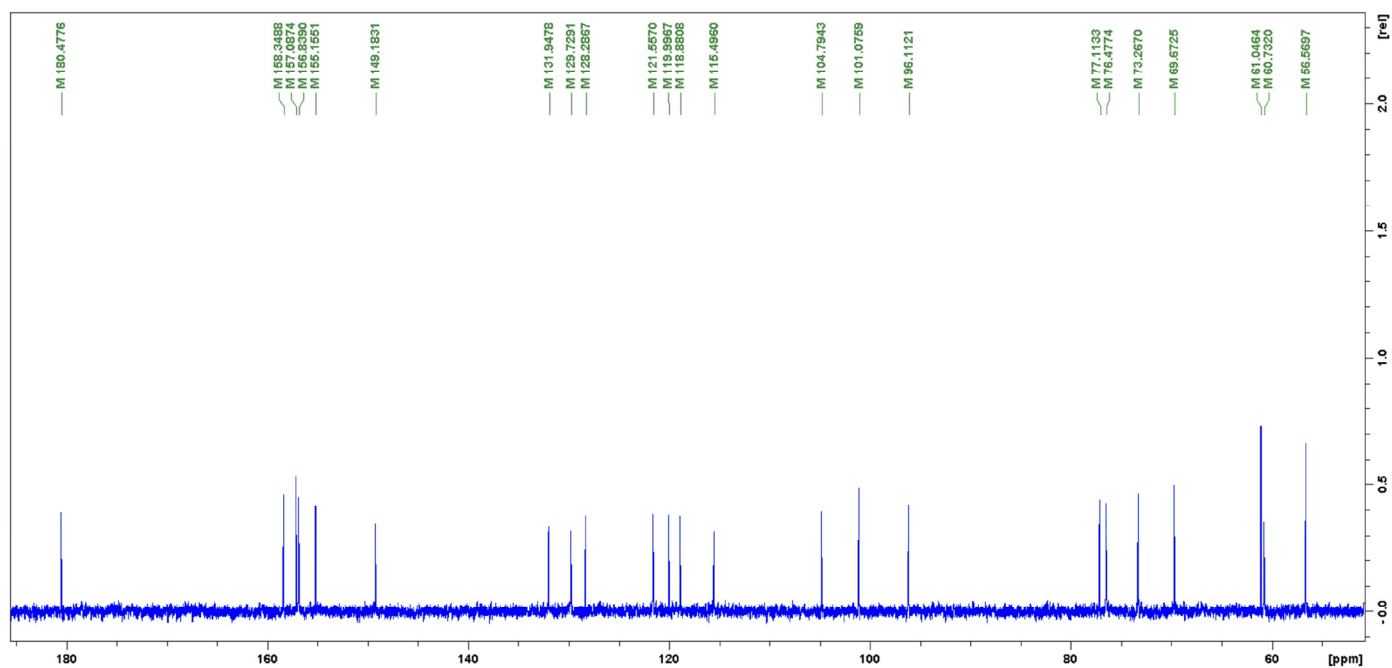

Figure S27 <sup>13</sup>C NMR spectrum of compound **9** (125 MHz, DMSO-*d*<sub>6</sub>)

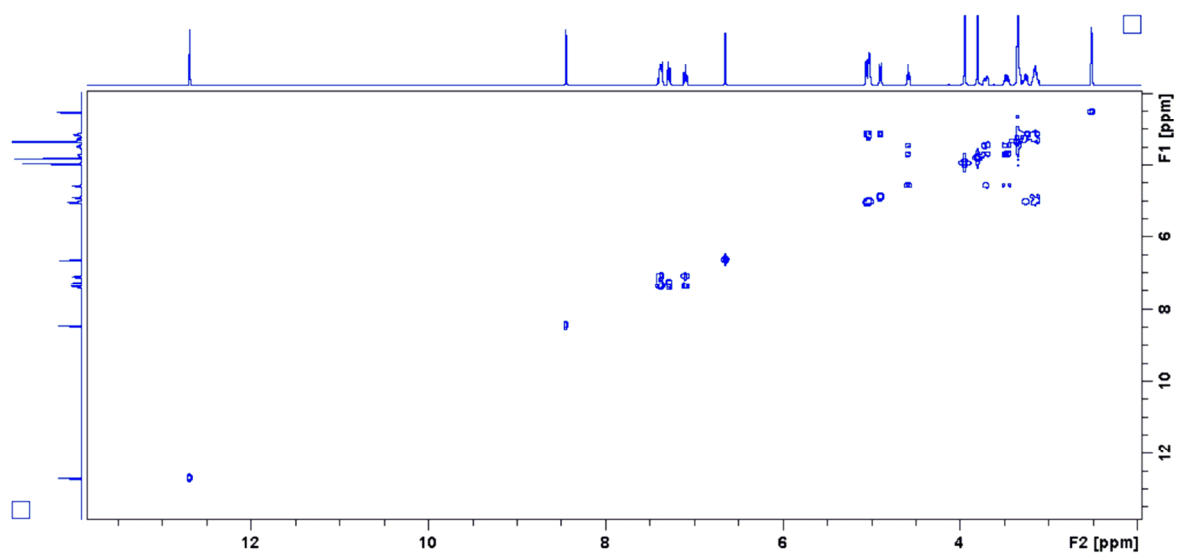

Figure S28  $^1\text{H}$ - $^1\text{H}$  COSY spectrum of compound 9 ( $\text{DMSO}-d_6$ )

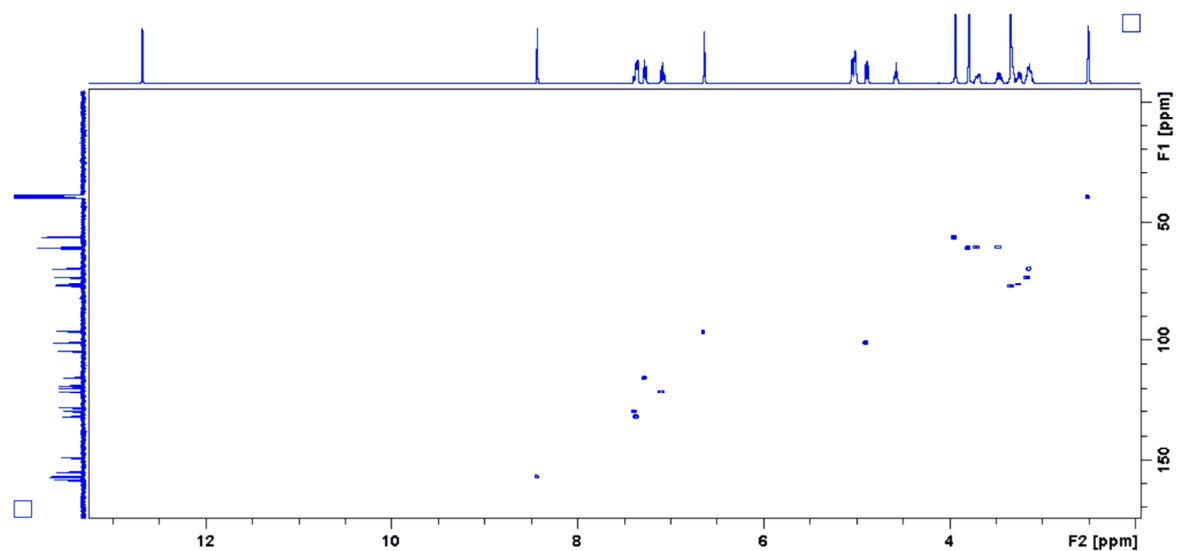

Figure S29 HSQC spectrum of compound 9 ( $\text{DMSO}-d_6$ )

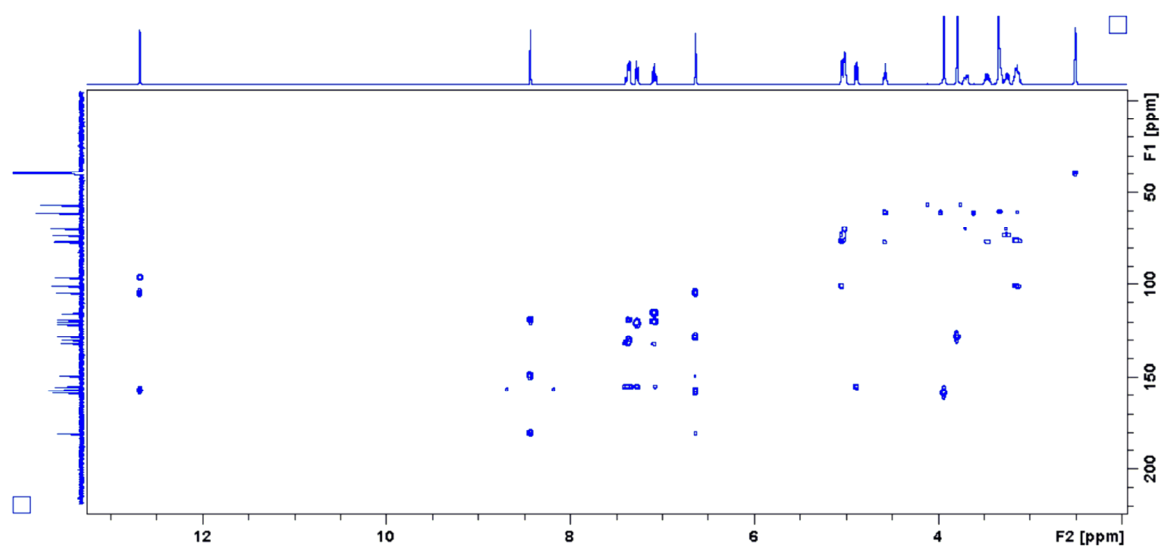

Figure S30 HMBC spectrum of compound 9 ( $\text{DMSO}-d_6$ )

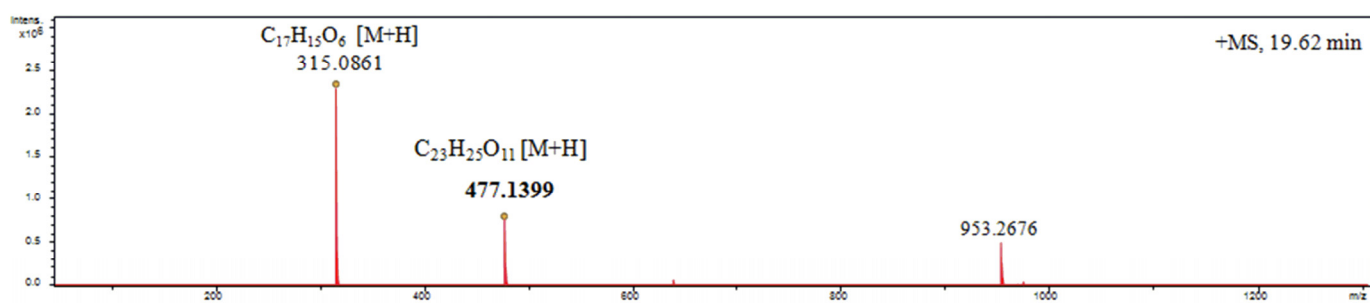

Figure S31 HR-ESI-MS spectrum of compound 9

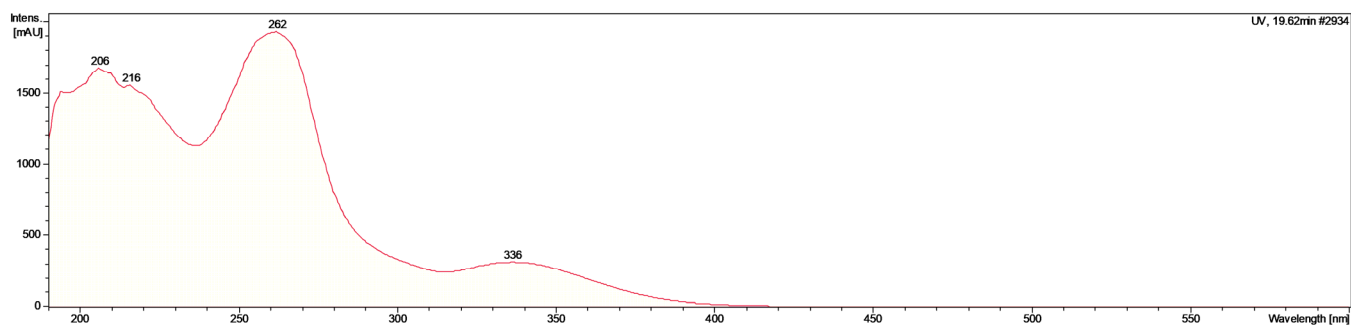

Figure S32 UV spectrum of compound 9

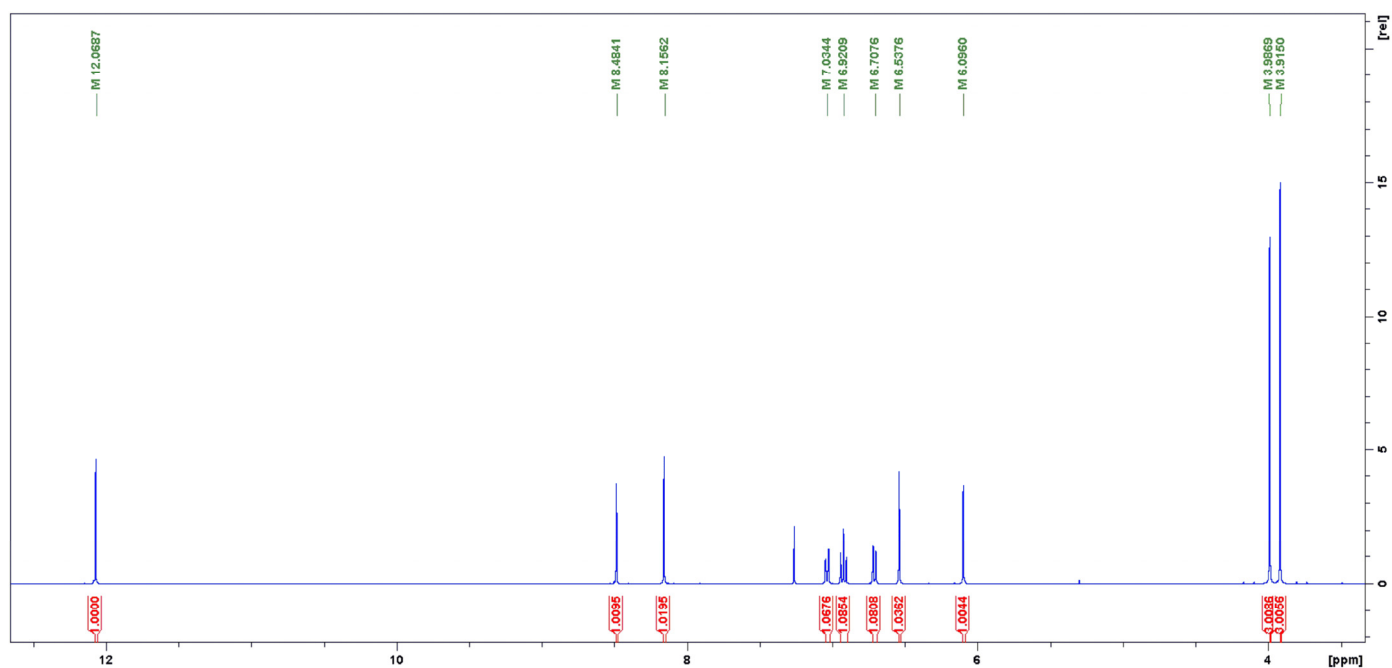

Figure S33 <sup>1</sup>H NMR spectrum of compound **10** (500 MHz, CDCl<sub>3</sub>)

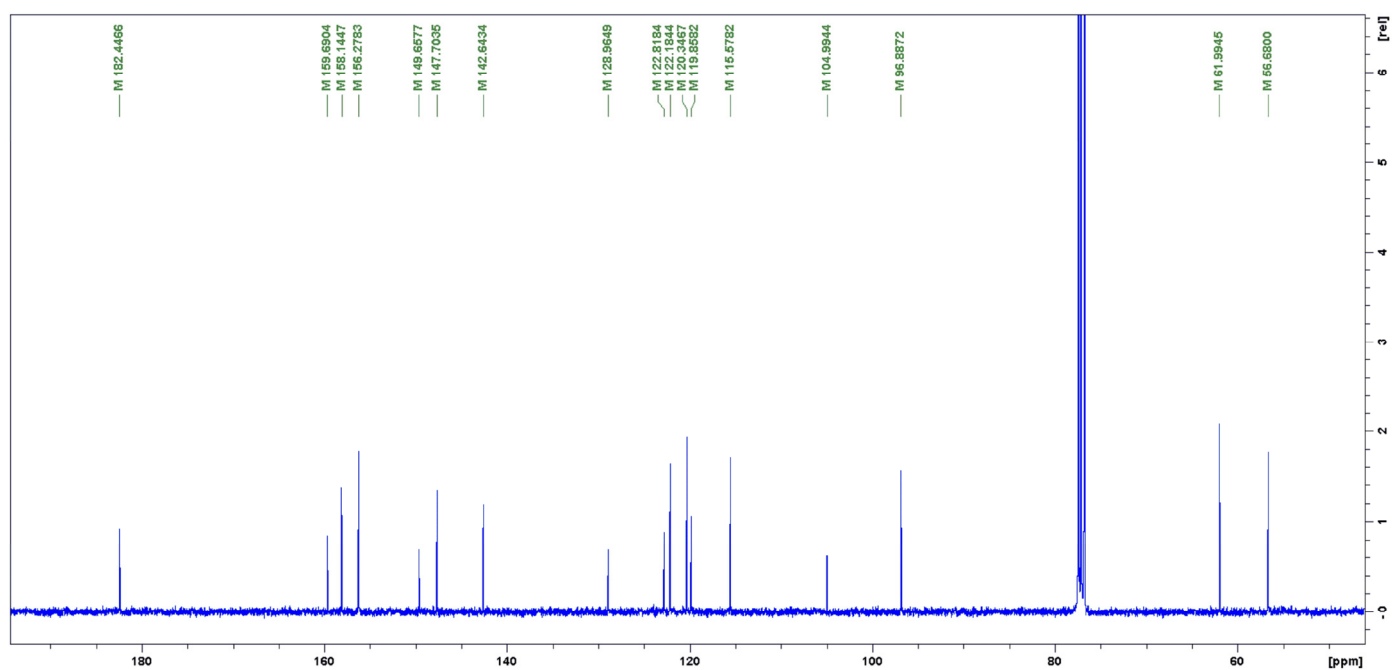

Figure S34 <sup>13</sup>C NMR spectrum of compound **10** (125 MHz, CDCl<sub>3</sub>)



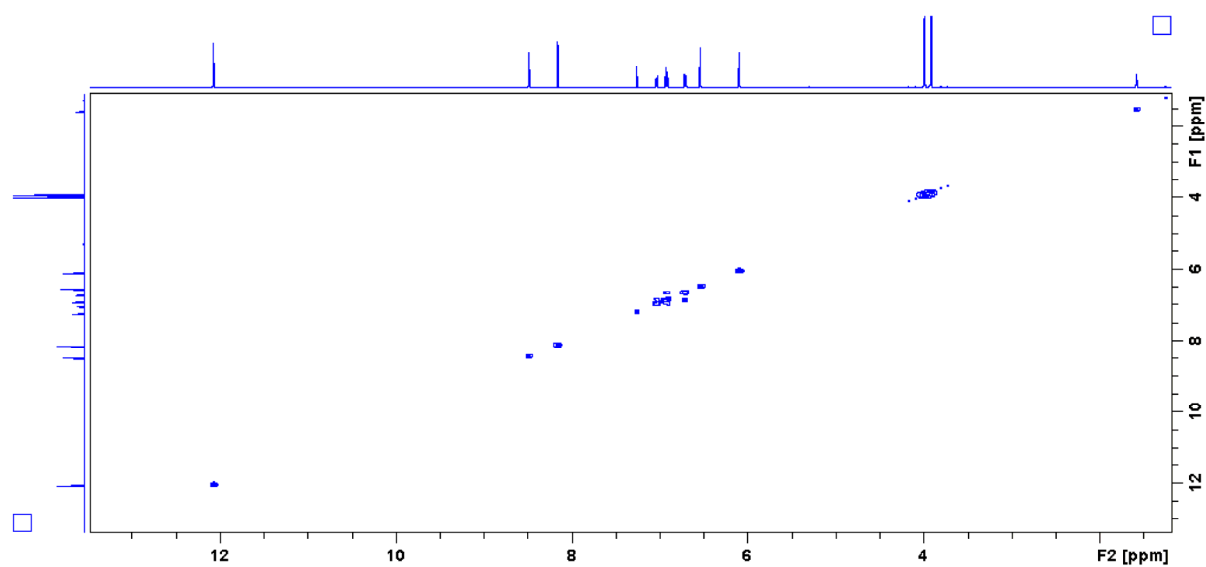

Figure S35  $^1\text{H}$ - $^1\text{H}$  COSY spectrum of compound **10** ( $\text{CDCl}_3$ )

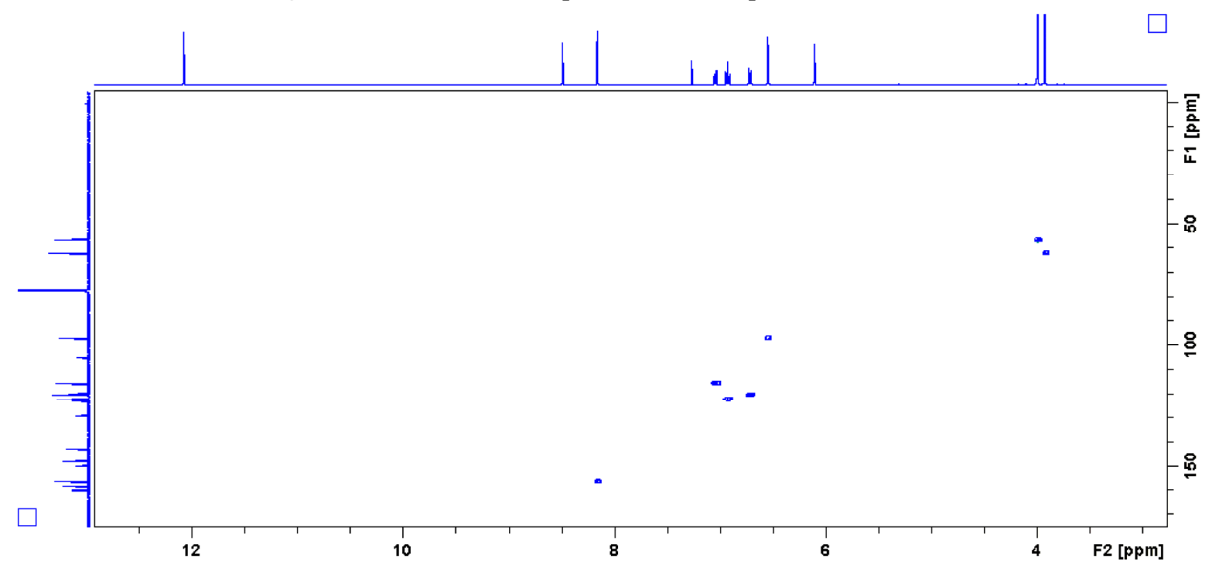

Figure S36 HSQC spectrum of compound **10** ( $\text{CDCl}_3$ )

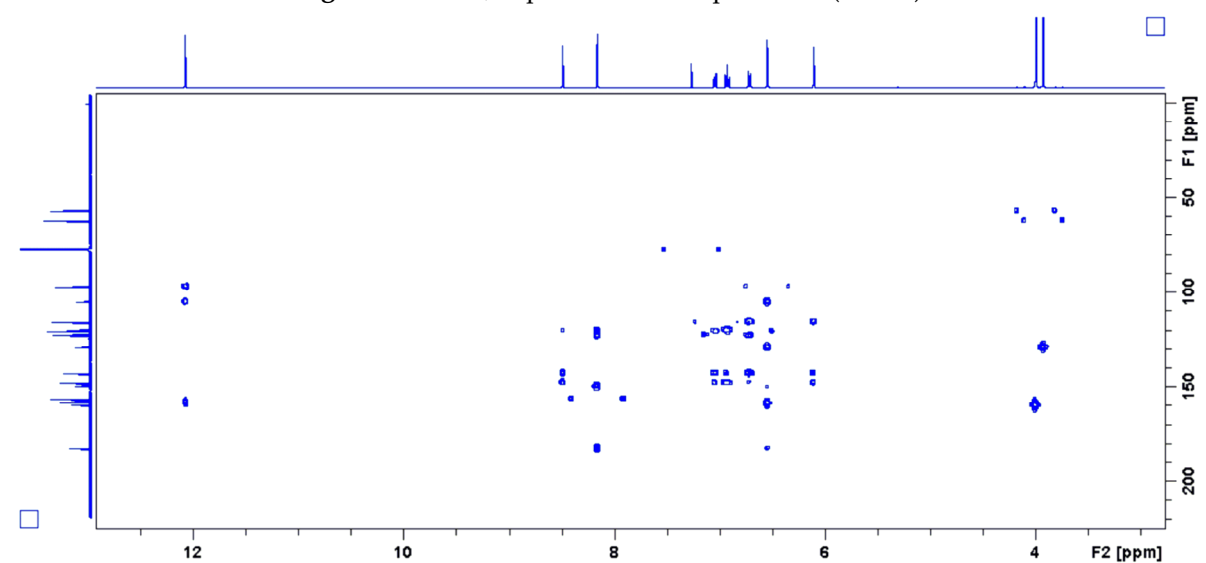

Figure S37 HMBC spectrum of compound **10** ( $\text{CDCl}_3$ )

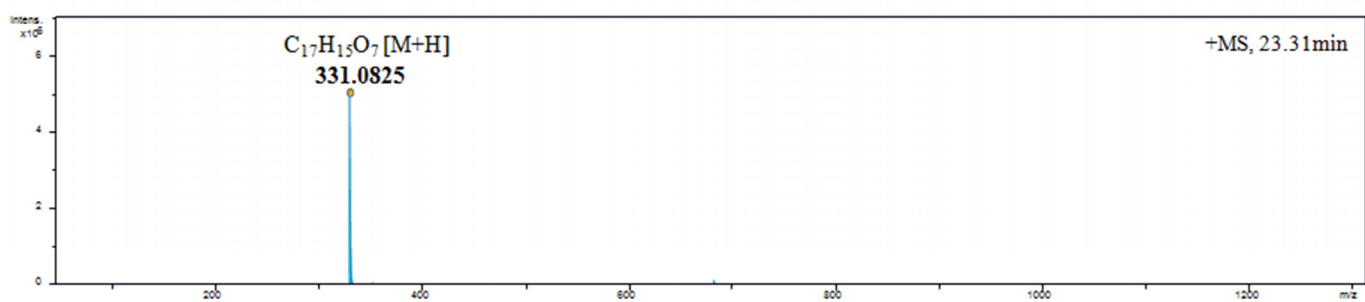

**Figure S38** HR-ESI-MS spectrum of compound 10

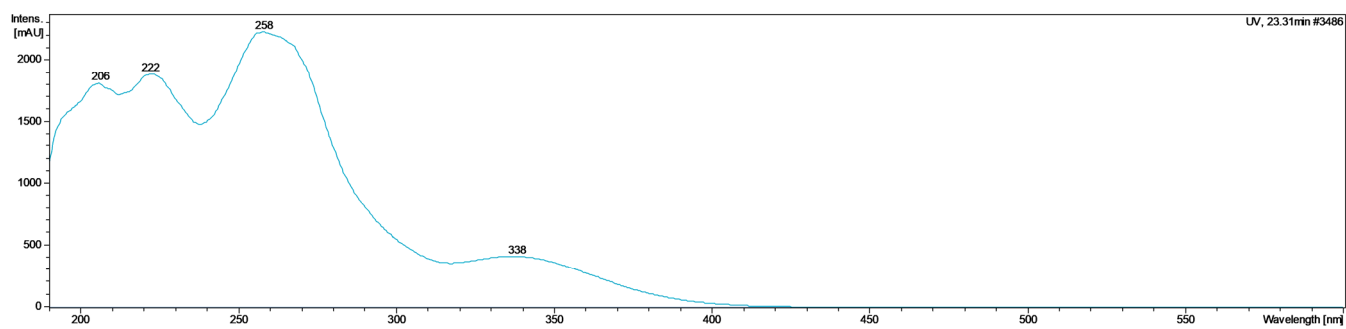

**Figure S39** UV spectrum of compound 10
